# Supplementary material for: Articular cartilage corefucosylation regulates tissue resilience in osteoarthritis
Source: eLife. 2024 Mar 11;12:RP92275. doi: 10.7554/eLife.92275 (PMC10928514; doi:10.7554/eLife.92275)
Supplement: Source data 1. [file elife-92275-data1.xlsx]

## Sheet: Figure 1
Figure 1D			Figure 1D
Femur			Femur-medial
Saline	Mannosidase		4w	16w	4w	16w	4w	16w
0	1		1	0	0	0	0	0
0	1.5		1.5	0	0	0	0	0
0	1.5		1.5	0	0	0	0	0
0	1		1	0	0	0	0	0
0	0		0	0	0	0	0	0
0	0		0	0	0	0	0	0
Tibia			Femur-lateral
Saline	Mannosidase		4w	16w	4w	16w	4w	16w
0	1		0	0	0	0	0	0
0	1.5		1.5	0	0	0	0	0
0	1		1.5	0	0	0	0	0
0	0		0	0	0	0	0	0
0	1		0	0	0	0	0	0
0	0		0	0	0	0	0	0
			Tibia-medial
			4w	16w	4w	16w	4w	16w
			1	0	0	0	0	0
			1.5	0	0	0	0	0
			1	0	0	0	0	0
			0	0	0	0	0	0
			1	0	0	0	0	0
			0	0	0	0	0	0
			Tibia-lateral
			4w	16w	4w	16w	4w	16w
			0	0	0	0	0	0
			1.5	0	0	0	0	0
			1.5	0	0	0	0	0
			0	0	0	0	0	0
			0	0	0	0	0	0
			0	0	0	0	0	0

## Sheet: Figure 1-suppl figure 1
Suppl 1A			Suppl 1B
100 μg/ml	1.0 μg/ml		100 μg/ml	1.0 μg/ml
7.72054	0.072973		6098.11	97.2973
7.00054	0.0656757		6214.86	92.4324
6.03	0.0535135		5244.32	90
8.60351	0.0632432		5200.54	77.8378

## Sheet: Figure 2
Figure 2C					Figure 2D								Figure 2F
control	mannosidase	sialidase	IL-1			day 3			day 6					control				mannosidase
12.0023	19.4665	3.73385	50.4705		control	6.51154	4.85231	2.84204	5.85113	7.21687	4.372		0	0.346752	0.048741	0.431898	-0.0364	0.219033	-0.0364	0.431898	0.048741
12.4699	18.6627	9.18219	48.6326		mannosidase	11.092	10.0895	13.393	7.5202	5.96511	6.6493		6	0.389325	0.261606	0.474471	0.006168	0.60219	0.006168	0.389325	-0.0364
8.00811	19.5135	10.7061	45.581		sialidase	4.223	4.33853	3.98686	9.05859	7.12824	7.91137		12	0.506228	-0.0624	0.181296	-0.18425	0.644763	0.261606	0.60219	0.17646
													24	0.474471	0.17646	0.687336	0.474471	0.900201	0.431898	1.02792	0.815055
Figure 2E													48	0.587461	0.221912	0.546844	0.384378	1.66651	1.45365	1.66651	1.15564
control	mannosidase	sialidase	IL-1										72	0.871776	0.628077	0.993626	0.546844	2.39026	2.04967	2.26254	1.41108
35.1626	39.2011	27.7466	32.0649
31.6932	32.5558	27.5223	32.6599
31.5628	34.588	28.04	29.645

## Sheet: Figure 2-suppl figure 2
Suppl 2
control	mannosidase	sialidase
1.13398	1.70939	0.35475
0.76781	1.81401	0.030662
1.34322	1.97094	0.207438
1.13398	2.18018	0.177975

## Sheet: Figure 3
Figure 3A, B, C			Day 3						Day 6							Figure 3D										Figure 3E
			control			mannosidase			control			mannosidase				(Hex)6 + (Man)3(GlcNAc)2					(Hex)2 (HexNAc)2					Fut8							Mmp13							Col2a1							Aggrecan
3	(Hex)2 (HexNAc)2	1178.5	0.655228	0.622586	0.345582	0.242042	0.197465	0.291021	2.30858	0.979069	1.90896	0.232995	0.254561	0.41534		－	＋	－	＋		－	＋	－	＋		0	1	6	12	24	36		0	1	6	12	24	36		0	1	6	12	24	36		0	1	6
4	(Hex)2 (HexNAc)2 (Fuc)1	1324.55	2.49646	2.73268	1.38846	0.654913	0.570464	0.84449	12.3036	4.69495	8.67674	0.44729	0.561555	0.826202		6.86769	2.32723	7.2586	3.36028		0.851463	0.30209	1.49838	0.49525		0.939523	1.31039	0.678302	1.72907	3.94493	2.82843		0.993093	0.858565	0.222211	0.15932	0.208772	0.271684		0.920188	0.882703	0.521233	0.870551	0.386891	0.146604		0.858565	0.590496	0.30566
5	(Hex)3 (HexNAc)2	1340.55	0.481702	0.529524	0.271355	0.422579	0.294124	0.3989	1.89665	0.660735	1.49814	0.374278	0.445964	0.752508		7.07236	2.62009	7.33121	3.87621		0.889655	0.317333	1.29193	0.385289		0.972655	0.993093	0.742262	1.67018	3.70635	4.59479		1.02101	1.09429	0.205898	0.15932	0.168404	0.285191		1	0.965936	0.554785	0.939523	0.323088	0.167241		1.08673	0.598739	0.348686
6	(Hex)3 (HexNAc)2 (Fuc)1	1486.61	1.17945	1.2342	0.638685	0.599051	0.449712	0.690012	4.18927	1.49171	2.85004	0.594248	0.6199	1.05965		5.76175	2.77546	8.90065	3.39037		0.635952	0.396729	2.3058	0.489567		1.09429	1.20581	0.806642	2	3.605	3.22657		0.986233	1.02101	0.198884	0.183011	0.154964	0.309927		1.08673	1.30134	0.582367	0.737135	0.266093	0.203063		1.07177	0.716978	0.356013
7	(Hex)4 (HexNAc)2	1502.6	0.630293	0.694153	0.377424	1.42715	1.02968	0.984375	1.94287	0.80937	1.51703	0.804297	1.22649	1.88094
8	(HexNAc)1 + (Man)3(GlcNAc)2	1543.63	0.250052	0.223549	0.146251	0.278011	0.171272	0.231952	0.414438	0.250997	0	0.226344	0.230311	0.40707		(Hex)5 + (Man)3(GlcNAc)2					(Hex)2 (HexNAc)2 (Fuc)1					Adamts8							Tgfb							Col10a1							Ihh
9	(Hex)4 (HexNAc)2 (Fuc)1	1648.66	0.312113	0.280052	0.176705	0.222272	0.167768	0.223445	0.805429	0.339166	0.544233	0.152364	0.205028	0.35807		－	＋	－	＋		－	＋	－	＋		0	1	6	12	24	36		0	1	6	12	24	36		0	1	6	12	24	36		0	1	6
10	(Hex)2 + (Man)3(GlcNAc)2	1664.65	11.1241	10.3337	6.78738	15.308	10.7163	12.8747	23.1468	12.842	11.1811	11.6527	14.9304	19.1964		3.35348	2.42025	3.66326	2.8823		3.24413	0.817389	7.98566	0.95075		0.823591	1.44393	0.590496	0.965936	6.19026	5.57897		0.965936	0.757858	0.476319	0.907519	2.2974	3.09513		0.823591	0.473029	4.11246	4.19887	0.632878	0.184284		0.844791	1.72508	27.7933
11	(HexNAc)1 (Fuc)1 + (Man)3(GlcNAc)2	1689.69	1.09171	0.996257	0.577371	1.16764	0.902946	1.32357	1.30566	0.638569	0.627041	1.01988	1.21369	1.88648		3.73033	2.46677	3.49987	2.57152		3.90491	0.916757	6.19523	0.849939		1.16473	1.61328	0.632878	0.972655	4.65893	5.77572		1.03526	0.76313	0.521233	0.920188	2.02792	2.12874		1.00696	0.566442	4.46915	4.59479	0.598739	0.25		0.597358	2.38943	25.5751
12	(Hex)1 (HexNAc)1 + (Man)3(GlcNAc)2	1705.68	0.118952	0	0.081898	0.144321	0.0631967	0.0889149	0.192673	0.112548	0.257295	0	0.150687	0.143519		3.07067	2.8509	5.45929	2.10275		2.55508	1.15123	10.4805	0.973854		1.04247	1.16473	0.80107	1.40444	4.11246	7.1602		1	0.864537	0.5	0.97942	1.68179	2.32947		1.20581	0.602904	4.19887	5.50217	0.712025	0.30566		1.9816	2.29209	27.6013
13	(HexNAc)2 + (Man)3(GlcNAc)2	1746.71	0	0.18499	0	0.216599	0.162837	0.217366	0.404364	0.202571	0.205084	0.124335	0.180783	0.210626
14	(Hex)2 (Fuc)1 + (Man)3(GlcNAc)2	1810.71	0.26677	0.246571	0.145868	0.176839	0.125768	0.160008	0.551202	0.271404	0.458222	0.150958	0.146417	0.222485		(Hex)4 + (Man)3(GlcNAc)2					(HexNAc)1 (Fuc)1 + (Man)3(GlcNAc)2
15	(Hex)3 + (Man)3(GlcNAc)2	1826.71	3.53399	3.6345	2.60706	4.93091	3.39182	4.19799	9.17739	4.33589	6.86018	2.89748	3.47478	3.24113		－	＋	－	＋		－	＋	－	＋
16	(Hex)1 (HexNAc)1 (Fuc)1 + (Man)3(GlcNAc)2	1851.74	0.637756	0.550876	0.344986	0.592737	0.439224	0.529117	0.764875	0.40179	0.428866	0.287117	0.377972	0.546583		2.51719	2.90904	2.68102	2.63024		1.41867	1.45732	0.847437	2.16783
17	(Hex)2 (HexNAc)1 + (Man)3(GlcNAc)2	1867.73	1.69276	0.532787	0.289733	0.480552	0.331588	0.40991	0.515471	0.354442	0.396985	0.283137	0.371074	0.452783		2.66425	2.78864	2.62887	2.29132		1.42362	1.45107	0.842626	1.83698
18	(HexNAc)2 (Fuc)1 + (Man)3(GlcNAc)2	1892.76	1.38821	1.12044	0.844289	2.3755	1.9952	3.08072	2.09028	1.03227	1.11163	1.86933	2.18883	3.27367		2.17118	2.98767	3.98138	1.81511		1.0625	1.80432	0.757391	2.22362
19	(Hex)1 (HexNAc)2 + (Man)3(GlcNAc)2	1908.76	0.640417	0.541854	0.555289	0.696633	0.441931	0.542173	1.07154	0.531043	0.450945	0.400015	0.560836	0.638549
20	(HexNAc)3 + (Man)3(GlcNAc)2	1949.79	0	0.121848	0.0900995	0.121147	0.0762758	0.132459	0.231769	0	0	0	0	0.159029		(Hex)3 + (Man)3(GlcNAc)2					(HexNAc)2 (Fuc)1 + (Man)3(GlcNAc)2
21	(Hex)4 + (Man)3(GlcNAc)2	1988.76	1.93706	1.86446	1.17984	2.3308	1.73527	2.19161	4.13069	1.99225	3.29617	1.23742	1.51387	1.53991		－	＋	－	＋		－	＋	－	＋
23	(Hex)2 (HexNAc)1 (Fuc)1 + (Man)3(GlcNAc)2	2013.79	0.664632	0.601761	0.399495	0.703469	0.579726	0.582498	0.911065	0.494231	0.566587	0.341674	0.477384	0.623822		4.59238	6.1542	5.95658	6.15882		1.80397	2.96483	1.35669	3.97341
25	(Hex)3 (HexNAc)1 + (Man)3(GlcNAc)2	2029.79	0.37388	0.302387	0.273472	0.420316	0.334951	0.347798	0.600371	0.337559	0.349867	0.275859	0.396787	0.381159		5.19358	5.45079	5.72143	5.25924		1.60107	3.20637	1.36214	3.3129
26	(Hex)1 (HexNAc)2 (Fuc)1 + (Man)3(GlcNAc)2	2054.82	3.33756	2.8183	2.43594	3.53365	2.61028	2.8252	5.33188	3.01387	2.60648	1.71299	2.55672	3.37175		4.79759	5.72282	8.28628	3.82036		1.55369	4.19973	1.34271	3.85871
27	(Hex)2 (HexNAc)2 + (Man)3(GlcNAc)2	2070.81	1.42534	1.27906	1.04575	1.48917	1.05735	1.27291	2.19256	1.17378	0.905275	0.75661	1.05691	1.21469
28	(HexNAc)3 (Fuc)1 + (Man)3(GlcNAc)2	2095.84	1.79138	1.39144	0.991326	2.06478	1.63506	2.22244	2.19571	1.12443	1.03349	1.15527	1.51831	2.29478		(Hex)2 + (Man)3(GlcNAc)2					(HexNAc)3 (Fuc)1 + (Man)3(GlcNAc)2
29	(Hex)1 (HexNAc)3 + (Man)3(GlcNAc)2	2111.84	0	0.218565	0.181894	0.217706	0.167733	0.218919	0.366023	0.179161	0	0.131318	0.180735	0.221822		－	＋	－	＋		－	＋	－	＋
30	(Hex)5 + (Man)3(GlcNAc)2	2150.81	2.58061	2.61051	1.66863	1.93917	1.53498	2.09128	5.64403	2.65231	4.51973	1.35601	1.699	1.78394		14.4557	19.1057	15.0234	24.7687		2.32789	2.57702	1.42512	2.45562
31	(HexNAc)4 + (Man)3(GlcNAc)2	2152.87	0.437916	0.313641	0.260236	0.298141	0.203725	0.235473	0.643138	0.328416	0	0	0.246195	0.36401		14.7665	17.2216	16.9457	22.5979		1.98832	2.62761	1.48374	2.29803
32	(Hex)1 (HexNAc)1 (Fuc)1 (NeuAc)1 + (Man)3(GlcNAc)2	2156.85	0	0.191331	0.131892	0.173666	0.147871	0.197242	0.430336	0.23828	0.361738	0	0.195934	0.264846		12.4904	17.5512	13.5054	22.627		1.82427	3.02969	1.24834	2.70489
34	(Hex)2 (HexNAc)1 (NeuAc)1 + (Man)3(GlcNAc)2	2172.85	0.295959	0.263064	0.238709	0.307209	0.232184	0.314183	0.454354	0.290479	0.331058	0.249916	0.310544	0.320926
36	(Hex)3 (HexNAc)1 (Fuc)1 + (Man)3(GlcNAc)2	2175.84	0.331509	0.28626	0.24641	0.312931	0.253584	0.289282	0.481574	0.293955	0.282863	0.19561	0.262228	0.303451
38	(Hex)4 (HexNAc)1 + (Man)3(GlcNAc)2	2191.84	0	0	0.0826132	0	0	0	0.194166	0	0	0	0.0899981	0
39	(Hex)1 (HexNAc)2 (Fuc)2 + (Man)3(GlcNAc)2	2200.88	1.82345	1.53228	1.07802	1.76543	1.1331	1.39159	2.24638	1.07689	1.2125	0.612227	1.01177	1.70544
41	(Hex)2 (HexNAc)2 (Fuc)1 + (Man)3(GlcNAc)2	2216.87	4.77466	4.34623	3.92559	5.62163	4.26884	4.72303	8.09445	4.34322	3.90927	2.9984	4.23782	4.83939
42	(Hex)3 (HexNAc)2 + (Man)3(GlcNAc)2	2232.87	0	0	0	0	0	0	0.127446	0	0	0.0785489	0.0781117	0
43	(HexNAc)3 (Fuc)2 + (Man)3(GlcNAc)2	2241.9	0.436326	0.38975	0.209562	0.315495	0.24279	0.340798	0.367552	0.202512	0.250299	0.159024	0.196167	0.316524
44	(Hex)1 (HexNAc)3 (Fuc)1 + (Man)3(GlcNAc)2	2257.9	3.22731	2.78548	2.79084	3.68296	2.89027	3.15271	5.40371	2.86634	2.40345	1.75281	2.62671	3.10667
45	(Hex)2(HexNAc)3+(Man)3(GlcNAc)2	2273.89	0	0	0.105899	0.0810268	0	0	0	0	0	0	0	0
46	(HexNAc)4 (Fuc)1 + (Man)3(GlcNAc)2	2298.92	5.85527	4.79864	4.81232	6.43202	4.93786	5.80914	9.43841	5.04433	3.49931	3.25142	4.51273	6.03842
47	(Hex)6 + (Man)3(GlcNAc)2	2312.86	5.2849	4.94928	3.13099	1.86464	1.63039	2.03595	11.1834	5.55583	7.36881	1.58088	2.56101	2.87633
49	(Hex)2 (HexNAc)1 (Fuc)1 (NeuAc)1 + (Man)3(GlcNAc)2	2318.91	0.516976	0.445026	0.324679	0.389243	0.349642	0.413624	0.697326	0.436882	0.429586	0.211697	0.34398	0.46771
51	(Hex)3 (HexNAc)1 (NeuAc)1 + (Man)3(GlcNAc)2	2334.9	0.433743	0.390295	0.284703	0.384078	0.344553	0.415907	0.618798	0.371643	0.404897	0.232187	0.363168	0.475816
55	(Hex)1 (HexNAc)2 (Fuc)1 (NeuAc)1 + (Man)3(GlcNAc)2	2359.93	0.467506	0.400794	0.30263	0.377618	0.375078	0.399921	0.668979	0.380858	0.357747	0.205121	0.321457	0.462779
56	(Hex)2 (HexNAc)2 (Fuc)2 + (Man)3(GlcNAc)2	2362.93	1.80653	1.58323	0.969387	1.54751	1.0609	1.32985	1.95813	0.998661	1.13074	0.516545	0.843783	1.44265
57	(Hex)2 (HexNAc)2 (NeuAc)1 + (Man)3(GlcNAc)2	2375.93	0.206221	0.110797	0.380407	0.413213	0.160918	0.16191	0.605081	0.355236	0	0.241748	0.343006	0.370184
59	(Hex)3 (HexNAc)2 (Fuc)1 + (Man)3(GlcNAc)2	2378.92	0	0	0.287453	0.21615	0	0	0.582218	0.297961	0	0.230631	0.349785	0.261169
61	(Hex)4 (HexNAc)2 + (Man)3(GlcNAc)2	2394.92	0	0	0.0551212	0	0	0	0.311304	0.214183	0	0.139182	0.219521	0.233675
62	(Hex)1 (HexNAc)3 (Fuc)2 + (Man)3(GlcNAc)2	2403.95	0.702169	0.574384	0.385221	0.624764	0.479667	0.545555	0.77339	0.376982	0.419849	0.22295	0.388039	0.62463
63	(Hex)2 (HexNAc)3 (Fuc)1 + (Man)3(GlcNAc)2	2419.95	0.5261	0.385501	0.893409	0.731152	0.489115	0.651895	1.12861	0.566732	0.394016	0.438395	0.589813	0.415169
64	(Hex)3 (HexNAc)3 + (Man)3(GlcNAc)2	2435.94	0.168722	0.134025	0.150327	0.130116	0.130748	0.134804	0	0.137299	0	0.0856139	0.122224	0
65	(HexNAc)4 (Fuc)2 + (Man)3(GlcNAc)2	2444.98	3.48749	3.00128	2.18814	3.38407	2.47812	2.8749	4.43321	2.19887	1.9157	1.12376	1.79417	3.29395
66	(Hex)1(HexNAc)4 (Fuc)1 + (Man)3(GlcNAc)2	2460.98	0	0	0	0	0	0	0.263551	0	0	0	0	0
72	(Hex)4 (HexNAc)1(Fuc)2 + (Man)3(GlcNAc)2	2483.95	0	0	0	0.0903387	0	0	0	0	0	0	0	0
78	(Hex)2 (HexNAc)2 (Fuc)1 (NeuAc)1 + (Man)3(GlcNAc)2	2521.99	2.38917	2.10661	2.31894	2.73204	2.73937	2.79217	3.83825	2.10505	1.78389	1.34343	2.18384	2.4996
79	(Hex)1 (HexNAc)2 (Fuc)2 (NeuGc)1 + (Man)3(GlcNAc)2	2521.99	0	0	0	0	0	0	3.83825	0	0	0	0	0
81	(Hex)3 (HexNAc)2 (NeuAc)1 + (Man)3(GlcNAc)2	2537.98	0	0.187666	0.145535	0	0	0.209034	0.373406	0.195168	0.259325	0.144982	0.217539	0
83	(Hex)4 (HexNAc)2 (Fuc)1 + (Man)3(GlcNAc)2	2540.98	0	0	0.247254	0.13497	0	0	0.740965	0.471594	0.187674	0.265806	0.410335	0.349884
84	(Hex)3 (HexNAc)2 (NeuGc)1 + (Man)3(GlcNAc)2	2553.98	0	0	0	0	0	0	0.333779	0.193766	0	0.110748	0.174582	0.227954
85	(Hex)1 (HexNAc)3 (Fuc)1 (NeuAc)1 + (Man)3(GlcNAc)2	2563.01	2.43742	2.13155	1.83393	2.55608	2.53558	2.64452	3.36	1.90538	1.38631	0.952548	1.5892	2.40274
87	(Hex)3 (HexNAc)3 (Fuc)1 + (Man)3(GlcNAc)2	2582	0	0.143301	0.191197	0.210154	0.169316	0	0.31078	0.158662	0	0	0.168228	0
88	(Hex)1(HexNAc)4 (Fuc)2 + (Man)3(GlcNAc)2	2607.03	0	0	0	0	0.12487	0	0	0	0	0	0	0
89	(Hex)2(HexNAc)4 (Fuc)1 + (Man)3(GlcNAc)2	2623.03	0	0.0902401	0.0912318	0.110027	0.103831	0.123684	0.168639	0	0	0	0.095316	0
97	(Hex)2 (HexNAc)2 (NeuAc)2 + (Man)3(GlcNAc)2	2681.04	0.20452	0.187299	0.209482	0.170866	0.21175	0.220166	0.432785	0.32949	0	0.159898	0.277803	0.559961
98	(Hex)3 (HexNAc)2 (Fuc)1 (NeuAc)1 + (Man)3(GlcNAc)2	2684.04	0.139418	0.119113	0.286985	0.190348	0.186697	0.200797	0.530123	0.307325	0	0.152177	0.239904	0.19695
101	(Hex)3 (HexNAc)2 (Fuc)1 (NeuGc)1 + (Man)3(GlcNAc)2	2700.03	0	0.0997327	0.0940738	0	0	0	0.644632	0.418952	0.253124	0.205868	0.358358	0.435901
102	(Hex)1 (HexNAc)3 (Fuc)2 (NeuAc)1 + (Man)3(GlcNAc)2	2709.07	0.569559	0.47459	0.264177	0.444984	0.486695	0.468178	0.552002	0.296294	0.280416	0.140799	0.2555	0.503407
104	(Hex)2 (HexNAc)2 (NeuGc)2 + (Man)3(GlcNAc)2	2713.03	0	0.0948339	0.103573	0	0.123313	0.109841	0.170993	0.11118	0	0	0.107085	0
105	(Hex)2 (HexNAc)3 (Fuc)1 (NeuAc)1 + (Man)3(GlcNAc)2	2725.06	0.210373	0.20442	0.180674	0.179963	0.199785	0.21283	0.361961	0.193608	0.186712	0.0821454	0.151261	0.218742
112	(Hex)2 (HexNAc)2 (Fuc)1 (NeuAc)2 + (Man)3(GlcNAc)2 lacton	2795.07	0.120967	0.1279	0.0834427	0.0880807	0.123156	0.142891	0.166139	0.124897	0.133164	0	0.0910068	0.142411
115	(Hex)2 (HexNAc)2 (Fuc)1 (NeuAc)2 + (Man)3(GlcNAc)2	2827.1	0.998837	1.00341	0.801089	0.931352	1.2776	1.25171	1.58174	0.974612	0.96697	0.375551	0.694762	1.09521
117	(Hex)3 (HexNAc)2 (NeuAc)2 + (Man)3(GlcNAc)2	2843.1	0	0	0	0	0.116163	0	0	0	0	0	0	0
121	(Hex)3 (HexNAc)3 (Fuc)1 (NeuAc)1 + (Man)3(GlcNAc)2	2887.12	0.158994	0.15168	0.154426	0.160233	0.202374	0.196819	0.247636	0.149098	0.132727	0	0.15434	0.167267
129	(Hex)2 (HexNAc)3 (Fuc)1 (NeuAc)2 + (Man)3(GlcNAc)2	3030.18	0	0	0	0	0.0686624	0	0	0	0	0	0	0
142	(Hex)3 (HexNAc)3 (Fuc)1 (NeuAc)2 + (Man)3(GlcNAc)2	3192.23	0.134486	0.139942	0.101182	0.124971	0.189047	0.173077	0.204169	0.124158	0.108598	0	0.0927481	0.150515
148	(Hex)3 (HexNAc)3 (NeuAc)3 + (Man)3(GlcNAc)2	3351.29	0.105704	0.0782614	0.102832	0.0882598	0.14693	0.11058	0.290139	0.23239	0.118002	0.101495	0.191672	0.499549
159	(Hex)3 (HexNAc)3 (Fuc)1 (NeuAc)3 + (Man)3(GlcNAc)2	3497.35	0.090562	0.0917201	0.0515895	0.0719103	0.12857	0.107394	0.134314	0	0.0708511	0	0.0693837	0.101662
163	(Hex)4 (HexNAc)4 (Fuc)1(NeuAc)2 + (Man)3(GlcNAc)2	3557.37	0	0	0	0.0291026	0.0439476	0	0	0	0	0	0	0
182	(Hex)4 (HexNAc)4 (Fuc)1 (NeuAc)3 + (Man)3(GlcNAc)2	3862.48	0	0	0	0	0.0324964	0	0	0	0	0	0	0
195	(Hex)4 (HexNAc)4 (Fuc)1 (NeuAc)4 + (Man)3(GlcNAc)2	4167.6	0	0	0	0	0.0238094	0	0	0	0	0	0	0
									154.071	75.7833	82.7896	47.046	66.0701	84.8384
[truncated: 3 more columns]

## Sheet: Figure 4
Figure 4D
Fut8			Mmp13			Tgfb			Adamts-5			Aggrecan
WT	F8D		WT	F8D		WT	F8D		WT	F8D		WT	F8D
1.07923	0		0.97716	1.73708		0.988514	0.179659		0.858565	1.19748		1.01162	0.720298
1.00696	0		1.00463	2.70695		0.974905	0.293887		1.02811	2.05623		0.963707	0.80478
0.920188	0		1.01866	2.59668		1.03766	0.248847		1.13288	2.08493		1.02574	0.80478
Figure 4F
					TGF-β1 treatment
Stimulus					Stimulus
flox(M-)	flox(M+)	cKO(M-)	cKO(M+)		flox(M-)	flox(M+)	cKO(M-)	cKO(M+)
5.5397	15.0087	7.80771	21.9396		5.55783	10.3037	4.53238	7.6358
7.52484	18.9594	7.4859	21.2996		6.74846	5.54524	6.66784	6.73485
11.7742	15.5422	9.61312	16.0615		6.57337	7.32189	8.35667	10.4557
Recovery					Recovery
flox(M-)	flox(M+)	cKO(M-)	cKO(M+)		flox(M-)	flox(M+)	cKO(M-)	cKO(M+)
3.52443	4.08484	5.4239	8.86324		2.52443	3.08485	3.51373	1.68573
3.40185	2.67274	5.98298	8.2152		3.40185	2.76637	2.41156	3.72135
3.0823	2.93862	4.59247	8.44611		1.8823	1.92882	1.90237	1.92882

## Sheet: Figure 4-suppl figure 1
Suppl 4
	(Hex)6 + (Man)3(GlcNAc)2	(Hex)5 + (Man)3(GlcNAc)2	(Hex)4 + (Man)3(GlcNAc)2	(Hex)3 + (Man)3(GlcNAc)2	(Hex)2 + (Man)3(GlcNAc)2
WT	27.9537	88.6739	21.2906	33.0886	33.9595
cKO	22.3155	76.1283	15.9265	29.8993	32.765

## Sheet: Figure 5
Figure 5A			Figure 5B
Weight			Male
Wild-type	Col2a1-Cre; Fut8^flox/flox		Week	Col2a1-Cre; Fut8^flox/flox															Fut8^flox/flox															Wild-type
1237	1264		3	6	9	7	8	7	8	8	6	7	7	7	7	7	8	8	9	9	9	8	8	8	5	9	9	8	12	8	10	9	9	8	8	7	8	7	7	9	8	8	9	9	8	7	8	8
1553	1472		4	14	13	11	10	11	12	10	10	11	8	11	14	12	12	9	15	16	16	12	13	9	13	15	16	15	14	12	14	12	14	13	12	14	12	12	11	14	14	14	12	10	10	14	10	13
1474	1148		5	11	14	16	17	14	16	14	15	12	15	14	17	11	13	14	21	21	21	18	18	13	18	17	19	19	20	20	18	16	16	17	17	16	19	18	19	16	19	18	16	16	18	17	16	16
1394	1264		6	14	16	16	18	16	17	15	18	16	19	17	15	17	15	15	24	23	23	20	20	17	19	20	22	22	22	23	23	21	22	19	19	20	19	18	21	20	21	20	19	23	21	19	17	16
1276	1227		7	18	19	19	17	15	17	18	20	20	19	19	19	16	19	17	25	24	24	22	22	19	21	23	24	23	24	25	23	20	24	20	21	21	22	19	23	22	23	26	23	25	23	17	20	18
1431	1203		8	18	19	20	19	19	19	21	18	19	20	17	20	18	19	16	26	26	25	24	24	21	23	26	27	24	22	26	26	27	26	20	23	22	23	24	20	24	25	25	23	22	24	20	22	22
			9	19	21	19	18	20	21	21	20	20	21	19	19	18	18	16	27	29	29	28	28	24	24	23	25	20	26	27	22	25	26	21	23	22	24	24	25	26	26	24	22	26	27	25	25	23
Body length			10	20	22	20	20	23	24	20	21	22	19	22	19	21	19	20	28	28	28	28	29	26	24	28	28	28	30	28	28	25	25	24	25	26	24	23	25	23	27	25	26	26	26	26	28	27
Wild-type	Col2a1-Cre; Fut8^flox/flox		11	22	23	22	22	22	23	22	21	22	23	19	21	19	20	19	29	28	28	29	30	30	30	29	25	26	25	25	24	26	27	26	27	24	25	26	27	25	23	27	27	26	28	28	27	29
26	24		12	22	23	23	22	22	24	26	22	23	24	20	25	20	20	20	30	29	28	27	26	24	27	30	31	31	30	30	25	27	27	26	27	24	29	27	26	25	23	29	29	27	29	29	29	30
25	25		Female
25	22		Weeks	Col2a1-Cre; Fut8^flox/flox															Fut8^flox/flox															Wild-type
27	26		3	8	8	8	8	8	5	6	7	8	7	7	6	8	8	7	8	9	9	5	8	6	9	9	6	9	9	9	7	7	8	8	7	7	7	7	7	8	6	7	8	8	8	10	10	9
24	22		4	13	12	12	11	12	11	8	10	13	8	11	9	10	12	13	12	13	14	13	9	8	12	15	14	14	10	13	14	12	12	10	12	12	12	12	12	10	9	12	13	12	12	14	13	12
23	25		5	16	14	15	15	14	12	13	12	14	13	13	14	16	14	14	16	17	17	16	11	11	16	18	12	16	17	14	14	15	16	14	16	15	15	16	15	13	11	16	15	14	16	17	18	17
			6	16	14	15	16	15	15	16	15	15	14	15	14	14	15	15	18	17	17	18	13	13	17	18	19	16	18	17	17	17	14	17	16	17	16	16	15	15	11	16	16	15	17	19	18	16
			7	16	15	16	16	14	15	15	16	14	15	16	14	15	15	16	18	18	18	19	14	15	17	20	15	19	18	20	17	19	18	16	16	16	15	17	18	16	17	17	19	22	15	18	16	17
			8	17	15	17	17	15	16	15	17	15	15	18	14	16	17	17	19	19	19	19	15	15	16	20	19	20	18	19	19	18	18	19	22	18	17	18	15	16	19	19	19	19	20	18	18	18
			9	18	16	18	17	16	17	15	16	18	15	17	16	18	15	17	18	19	19	21	19	21	21	18	19	17	18	19	20	19	18	19	18	18	16	18	18	19	17	18	23	20	19	18	18	18
			10	17	15	18	18	15	16	17	19	16	16	19	16	17	18	13	17	21	21	20	21	21	18	20	19	18	21	21	20	19	20	19	18	16	18	18	20	20	19	19	25	20	19	19	18	19
			11	18	16	19	18	16	17	17	19	16	16	19	16	17	17	17	19	19	20	19	19	18	19	21	20	22	18	21	19	20	22	19	20	19	17	18	20	21	19	21	24	20	19	20	19	19
			12	19	16	18	18	16	18	17	20	17	19	20	20	16	19	17	21	21	22	21	23	22	19	19	18	19	22	21	21	18	20	19	18	20	18	20	20	20	21	21	26	22	21	21	21	22
Figure 5E						Figure 5G
Fut8flox/flox/Sham	Col2a1-Cre; Fut8flox/flox/Sham	Fut8flox/flox/DMM	Col2a1-Cre; Fut8flox/flox/DMM			Month	Wild-type					Fut8^flox/flox					Col2a1-Cre; Fut8^flox/flox
0	0	1.5	7			3	0	0	0.5	1	0.5	0	1.5	0	0.5	0	0.5	0.5	0	0.5	1
1	0.5	3	2.5			4	0.5	0	0.5	0.5	0.5	0.5	1	0.5	0	0.5	3	1.5	2	3	2.5
0	0	2.5	5			9	0.5	1	1	0.5	1	1	1.5	0.5	1.5	0.5	4	3	5	3	2.5
0	0	3	8			15	1.5	2	3	3	3	3	4	2.5	3	2.5	12	6	11	5	12
0	0	4	6

## Sheet: Figure 5-suppl figure 1
Suppl 5
Wild-type	Col2a1-Cre; Fut8^flox/flox
80.2164	139.989
102.512	112.325
99.3713	162.313
120.781	156.711
113.737	147.524
88.9323	140.239
103.216	124.268
77.2523	172.313
109.331	166.32
105.218	138.744
