# Supplementary material for: Articular cartilage corefucosylation regulates tissue resilience in osteoarthritis
Source: eLife. 2024 Mar 11;12:RP92275. doi: 10.7554/eLife.92275 (PMC10928514; doi:10.7554/eLife.92275)
Supplement: Supplementary file 1. [file elife-92275-supp1.xlsx]

## Sheet: Sheet1
	Primer sequence used in this study
	Gene				Sequence
	Ppia		Forward		GGTGGTGACTTCACACGCCATAATG
			Reverse		CTTGCCATCCAACCACTCAGTCTTG
	Fut8		Forward		TGTTCTGGCTGAGGCCATCTA
			Reverse		GTGCCCAGAGTAACAGCAGGA
	Tgf-β		Forward		CTGCTGACCCCCACTGATAC
			Reverse		AGCCCTGTATTCCGTCTCCT
	Mmp13		Forward		TTGGCCACTCCCTAGGTCTG
			Reverse		GGTTGGGGTCTTCATCGC
	Col10a1		Forward		GGCTTCAGGGAGTGCAATC
			Reverse		CTCACATGGGAGCCACTAGG
	Col2a1		Forward		AGGATGGCTGCACCAAACAC
			Reverse		TGTCCATGGGTGCGATGTC
	Ihh		Forward		CTCTTGCCTACAAGCAGTTCA
			Reverse		CCGTGTTCTCCTCGTCCTT
	Aggrecan		Forward		CCCTCACCCCAAGAATCAAG
			Reverse		GGATAGTTGGGGAGCGACAC
	Adamts5		Forward		GCATGCGCGCTACACTCTAA
			Reverse		TCGCGGTTGTAGACATGCAG
